# Supplementary material for: Serum Interleukin (IL)-23 and IL-17 Profile in Inflammatory Bowel Disease (IBD) Patients Could Differentiate between Severe and Non-Severe Disease
Source: MDPI journal article supplement (doi:10.3390/jpm11111130), 2021-11-02
Supplement: s1 [file s1]

**Supplementary Table S2.** Comparison between groups according to IL-17, IL-23 and standard inflammatory biomarkers levels

| Variables<br>(Median, IQR) | CD                       |                            |         | UC                           |                            |         |
|----------------------------|--------------------------|----------------------------|---------|------------------------------|----------------------------|---------|
|                            | Mild or moderate (n=16)  | Severe<br>(n = 15)         | p value | Mild or moderate<br>(n = 14) | Severe<br>(n = 17)         | p value |
| Albumin (g/dL)             | 4 (3.82; 4.4)            | 3.7 (3.6; 4.2)             | 0.02    | 4 (3.97; 4.3)                | 3.9 (3.5; 4)               | 0.008   |
| ESR                        | 34.5 (17.25; 85.5)       | 65 (20; 102)               | 0.1     | 31 (17.5; 60)                | 48 (25; 106)               | 0.1     |
| CRP (mg/L)                 | 0.39 (0.32; 0.72)        | 3.1 (0.46; 7.9)            | 0.008   | 0.47 (0.37; 0.65)            | 1.2 (0.39; 5.29)           | 0.1     |
| Calprotectin (µg/g)        | 50 (45; 370)             | 640 (400; 1000)            | <0.001  | 260 (50; 812.5)              | 1200 (905; 1700)           | 0.001   |
| IL-17 (pg/mL)              | 764.52 (528.43; 1222.05) | 1695.00 (665.35; 2535.75)  | 0.1     | 976.47 (528.43; 1222.05)     | 2304.60 (1011.30; 2815.42) | 0.004   |
| IL-23 (pg/mL)              | 777.63 (744.15; 800.31)  | 1477.49 (1434.29; 1537.97) | <0.001  | 745.23 (731.19; 946.11)      | 1468.85 (1451.57; 1598.46) | < 0.001 |

<sup>1</sup>CD, Crohn’s disease; UC, ulcerative colitis. IQR, Interquartile range. ESR, Erythrocyte sedimentation rate. CRP, C-reactive protein. IL, Interleukin.
