# Supplementary material for: Serum Interleukin (IL)-23 and IL-17 Profile in Inflammatory Bowel Disease (IBD) Patients Could Differentiate between Severe and Non-Severe Disease
Source: MDPI journal article supplement (doi:10.3390/jpm11111130), 2021-11-02
Supplement: s1 [file s1]

**Supplementary Table S1.** Classification of study participants according to disease severity

| Criteria/ Severity       | CD               |                                 | UC               |                         |
|--------------------------|------------------|---------------------------------|------------------|-------------------------|
|                          | Mild or moderate | Severe                          | Mild or moderate | Severe                  |
| CDAI/ Mayo score         | 150 - 220        | 220 - 450                       | 3 - 10           | 11 - 12                 |
| SES-CD/ Mayo endoscopic  | 3 - 15           | > 16                            | 2-6              | ➤ 7                     |
| Disease extension        | -                | -                               | -                | Extensive/ Pancolitis   |
| Intestinal complications | -                | Abscess/ Fistula/<br>Strictures | -                | -                       |
| IBD-related surgery      | -                | Yes                             | -                | Yes                     |
| Frequent relapses        | -                | > 3 courses of steroids         | -                | > 3 courses of steroids |

<sup>1</sup>CD, Crohn's disease. UC, Ulcerative colitis. CDAI, Crohn's disease activity index. SES-CD, Simple Endoscopic Score for Crohn's disease.
